# Supplementary material
Source: MDPI journal article supplement (https://www.mdpi.com/search?q=cancers-12-01613)
Supplement: s001 [file cancers-12-01613-s001.pdf]

## Supplementary Materials

# The Quality of Practice Guidelines for Melanoma: A Methodologic Appraisal with the AGREE II and AGREE-REX Instruments

Theresa Steeb, Anja Wessely, Konstantin Drexler, Martin Salzmann, Frédéric Toussaint, Lucie Heinzerling, Markus Reinholz, Carola Berking and Markus V. Heppt

**Table S1.** Overview of AGREE II mean scores ( $\pm$  standard deviation) of the 6 CM guidelines assessed by 5 independent reviewers on a scale ranging from 1 (lowest quality) to 7 (highest quality).

| Domain/item                                               | Australia       | France          | Germany         | Scotland        | Spain           | USA             |
|-----------------------------------------------------------|-----------------|-----------------|-----------------|-----------------|-----------------|-----------------|
| <b>Scope and Purpose</b>                                  |                 |                 |                 |                 |                 |                 |
| 1 Description overall objectives                          | 6.00 $\pm$ 0.71 | 3.80 $\pm$ 1.79 | 6.80 $\pm$ 0.45 | 6.40 $\pm$ 0.55 | 2.40 $\pm$ 1.67 | 5.00 $\pm$ 1.58 |
| 2 Description health questions                            | 7.00 $\pm$ 0.00 | 4.40 $\pm$ 1.82 | 6.80 $\pm$ 0.45 | 6.40 $\pm$ 0.55 | 2.80 $\pm$ 1.30 | 6.20 $\pm$ 1.30 |
| 3 Description of patient population at focus              | 3.20 $\pm$ 1.80 | 3.80 $\pm$ 2.12 | 7.00 $\pm$ 0.00 | 5.80 $\pm$ 1.79 | 2.60 $\pm$ 1.82 | 6.20 $\pm$ 1.79 |
| Overall percentage of scope and purpose                   | 73%             | 50%             | 98%             | 87%             | 27%             | 80%             |
| <b>Stakeholder Involvement</b>                            |                 |                 |                 |                 |                 |                 |
| 4 Relevant groups included in guideline group             | 6.80 $\pm$ 0.45 | 4.60 $\pm$ 0.89 | 6.00 $\pm$ 1.73 | 6.00 $\pm$ 1.00 | 3.00 $\pm$ 1.41 | 5.00 $\pm$ 2.12 |
| 5 Patient preferences considered                          | 5.00 $\pm$ 1.00 | 2.40 $\pm$ 1.52 | 6.20 $\pm$ 0.45 | 5.60 $\pm$ 1.14 | 1.20 $\pm$ 0.45 | 4.40 $\pm$ 1.67 |
| 6 Target users defined                                    | 3.40 $\pm$ 2.10 | 3.20 $\pm$ 1.64 | 7.00 $\pm$ 0.00 | 5.60 $\pm$ 1.95 | 1.60 $\pm$ 0.55 | 4.00 $\pm$ 1.23 |
| Overall percentage of stakeholder involvement             | 68%             | 41%             | 90%             | 79%             | 16%             | 58%             |
| <b>Rigor of Development</b>                               |                 |                 |                 |                 |                 |                 |
| 7 Systematic literature research                          | 6.40 $\pm$ 0.89 | 5.20 $\pm$ 0.45 | 7.00 $\pm$ 0.00 | 6.80 $\pm$ 0.45 | 2.60 $\pm$ 1.34 | 6.40 $\pm$ 0.89 |
| 8 Description of literature selection criteria            | 5.20 $\pm$ 2.12 | 4.60 $\pm$ 1.52 | 6.80 $\pm$ 0.45 | 5.20 $\pm$ 1.30 | 2.20 $\pm$ 0.45 | 6.40 $\pm$ 0.89 |
| 9 Strengths and limitations of evidence                   | 5.40 $\pm$ 0.89 | 5.20 $\pm$ 0.45 | 6.60 $\pm$ 0.55 | 5.40 $\pm$ 1.34 | 4.20 $\pm$ 1.79 | 4.80 $\pm$ 1.10 |
| 10 Description methods for formulating recommendations    | 6.40 $\pm$ 0.89 | 4.00 $\pm$ 2.12 | 7.00 $\pm$ 0.00 | 5.40 $\pm$ 1.14 | 2.40 $\pm$ 1.67 | 4.80 $\pm$ 1.30 |
| 11 Side-effect, risks considered in recommendations       | 5.40 $\pm$ 1.34 | 2.60 $\pm$ 2.07 | 6.20 $\pm$ 0.84 | 6.20 $\pm$ 0.45 | 3.40 $\pm$ 1.52 | 5.80 $\pm$ 0.45 |
| 12 Link between evidence and recommendations              | 6.80 $\pm$ 0.45 | 4.20 $\pm$ 2.95 | 7.00 $\pm$ 0.00 | 6.40 $\pm$ 1.34 | 5.40 $\pm$ 1.52 | 6.00 $\pm$ 1.23 |
| 13 External review prior to publication                   | 5.40 $\pm$ 1.14 | 2.80 $\pm$ 1.10 | 6.20 $\pm$ 1.30 | 6.40 $\pm$ 1.34 | 2.40 $\pm$ 1.14 | 4.40 $\pm$ 1.67 |
| 14 Procedure for updating provided                        | 6.80 $\pm$ 0.45 | 1.80 $\pm$ 0.45 | 6.60 $\pm$ 0.55 | 5.60 $\pm$ 2.61 | 1.00 $\pm$ 0.00 | 3.60 $\pm$ 2.07 |
| Overall percentage of methodology                         | 83%             | 47%             | 95%             | 82%             | 33%             | 71%             |
| <b>Clarity and Presentation</b>                           |                 |                 |                 |                 |                 |                 |
| 15 Recommendation specific and unanimous                  | 5.80 $\pm$ 1.10 | 4.80 $\pm$ 2.17 | 6.80 $\pm$ 0.45 | 6.00 $\pm$ 1.73 | 4.60 $\pm$ 1.95 | 4.80 $\pm$ 1.92 |
| 16 Clear presentation of different treatment options      | 5.80 $\pm$ 0.84 | 4.00 $\pm$ 2.00 | 6.60 $\pm$ 0.55 | 6.00 $\pm$ 1.23 | 4.80 $\pm$ 1.79 | 5.20 $\pm$ 2.05 |
| 17 Key recommendations easily identifiable                | 6.60 $\pm$ 0.55 | 7.00 $\pm$ 0.00 | 7.00 $\pm$ 0.00 | 6.60 $\pm$ 0.89 | 3.40 $\pm$ 2.41 | 5.00 $\pm$ 2.74 |
| 18 Tools for application available                        | 5.40 $\pm$ 2.51 | 2.40 $\pm$ 1.95 | 3.60 $\pm$ 2.07 | 3.20 $\pm$ 1.92 | 2.00 $\pm$ 1.41 | 2.60 $\pm$ 2.30 |
| Overall percentage of clarity and presentation            | 86%             | 71%             | 97%             | 87%             | 54%             | 67%             |
| <b>Applicability</b>                                      |                 |                 |                 |                 |                 |                 |
| 19 Discussion of organizational facilitators and barriers | 6.40 $\pm$ 0.55 | 2.40 $\pm$ 1.95 | 6.20 $\pm$ 1.10 | 5.40 $\pm$ 1.52 | 2.00 $\pm$ 1.41 | 2.60 $\pm$ 2.30 |
| 20 Consideration of costs of guideline implementation     | 5.00 $\pm$ 2.55 | 2.40 $\pm$ 1.94 | 5.00 $\pm$ 1.41 | 5.20 $\pm$ 1.92 | 2.00 $\pm$ 1.41 | 3.00 $\pm$ 1.52 |
| 21 Inclusion of monitoring/auditing criteria              | 5.20 $\pm$ 2.05 | 3.80 $\pm$ 1.64 | 6.20 $\pm$ 0.84 | 5.00 $\pm$ 1.58 | 3.60 $\pm$ 1.34 | 4.20 $\pm$ 1.10 |
| Overall percentage of applicability                       | 75%             | 29%             | 71%             | 62%             | 23%             | 35%             |
| <b>Editorial Independence</b>                             |                 |                 |                 |                 |                 |                 |
| 22 Editorial independence from funding body               | 5.00 $\pm$ 1.00 | 6.20 $\pm$ 1.30 | 5.60 $\pm$ 1.14 | 4.00 $\pm$ 2.00 | 2.40 $\pm$ 1.95 | 6.20 $\pm$ 1.30 |
| 23 Reporting of conflicts of interests                    | 5.20 $\pm$ 2.49 | 4.80 $\pm$ 2.39 | 5.80 $\pm$ 2.68 | 4.80 $\pm$ 2.28 | 3.40 $\pm$ 2.41 | 5.80 $\pm$ 2.68 |

|                                              |             |             |             |             |             |             |
|----------------------------------------------|-------------|-------------|-------------|-------------|-------------|-------------|
| Overall percentage of editorial independence | 68%         | 75%         | 78%         | 57%         | 32%         | 83%         |
| <b>Total Score</b>                           | 5.80 ± 0.45 | 3.40 ± 0.89 | 6.60 ± 0.55 | 5.80 ± 0.45 | 2.80 ± 0.45 | 5.00 ± 0.71 |
| <b>Overall Assessment</b>                    | 60%         | 27%         | 70%         | 60%         | 20%         | 50%         |

**Table S2.** Overview of AGREE-REX mean scores (± standard deviation) of the 6 CM guidelines assessed by 5 independent reviewers on a scale ranging from 1 (lowest quality) to 7 (highest quality).

| Item                           | Australia   | France      | Germany     | Scotland    | Spain       | USA         | Overall assessment |
|--------------------------------|-------------|-------------|-------------|-------------|-------------|-------------|--------------------|
| <b>Clinical Applicability</b>  |             |             |             |             |             |             |                    |
| Evidence                       | 6.60 ± 0.55 | 4.00 ± 1.23 | 6.80 ± 0.45 | 5.40 ± 1.95 | 4.80 ± 2.17 | 5.40 ± 1.34 | 5.50 ± 1.64        |
| To users                       | 5.20 ± 1.10 | 5.40 ± 0.55 | 6.80 ± 0.45 | 5.00 ± 1.23 | 3.20 ± 1.10 | 5.00 ± 1.58 | 5.10 ± 1.45        |
| To patients and populations    | 4.80 ± 0.84 | 3.80 ± 1.48 | 6.60 ± 0.55 | 4.80 ± 1.79 | 3.00 ± 1.58 | 4.60 ± 2.19 | 4.60 ± 1.77        |
| Overall percentage             | 76%         | 57%         | 96%         | 68%         | 44%         | 67%         |                    |
| <b>Values and Preferences</b>  |             |             |             |             |             |             |                    |
| Of target users                | 5.00 ± 1.41 | 3.40 ± 1.67 | 6.00 ± 1.41 | 5.40 ± 0.89 | 3.20 ± 1.79 | 4.60 ± 1.34 | 4.60 ± 1.67        |
| Of patients and populations    | 5.40 ± 0.55 | 2.20 ± 1.64 | 6.20 ± 0.45 | 4.80 ± 1.64 | 1.40 ± 0.89 | 4.00 ± 1.58 | 4.00 ± 2.07        |
| Of policy and decision-makers  | 5.00 ± 2.35 | 3.40 ± 1.95 | 5.20 ± 2.49 | 3.20 ± 2.28 | 1.60 ± 0.55 | 2.20 ± 1.64 | 3.43 ± 2.25        |
| Of guideline developer         | 5.60 ± 0.89 | 2.00 ± 1.23 | 5.40 ± 1.52 | 3.40 ± 1.52 | 2.20 ± 1.63 | 3.00 ± 1.23 | 3.60 ± 2.01        |
| Overall percentage             | 71%         | 29%         | 78%         | 53%         | 18%         | 41%         |                    |
| <b>Implementability</b>        |             |             |             |             |             |             |                    |
| Purpose                        | 5.60 ± 0.89 | 4.20 ± 1.30 | 5.80 ± 1.10 | 4.80 ± 1.64 | 4.00 ± 1.23 | 5.20 ± 0.45 | 4.93 ± 1.26        |
| Local application and adoption | 5.60 ± 0.55 | 3.80 ± 1.48 | 5.60 ± 1.14 | 4.60 ± 2.07 | 2.60 ± 0.89 | 5.00 ± 1.41 | 4.53 ± 1.63        |
| Overall percentage             | 77%         | 50%         | 78%         | 62%         | 38%         | 68%         |                    |

**Table S3.** Overview of the guideline databases searched for “cutaneous melanoma”.

| Guideline Database (Last Update: 20 December 2019)                                                                                                                                                              | Initial Hits |
|-----------------------------------------------------------------------------------------------------------------------------------------------------------------------------------------------------------------|--------------|
| Arbeitsgemeinschaft der Wissenschaftlichen Medizinischen Fachgesellschaften: AWMF ( <a href="https://www.awmf.org/leitlinien/leitlinien-suche.html">https://www.awmf.org/leitlinien/leitlinien-suche.html</a> ) | 27           |
| Ärztliches Zentrum für Qualität in der Medizin: ÄZQ ( <a href="http://leitlinien.de">leitlinien.de</a> )                                                                                                        | 0            |
| Arzneimittelkommission der deutschen Ärzteschaft (AkdÄ) ( <a href="http://www.akdae.de">http://www.akdae.de</a> )                                                                                               | 66           |
| National Institute for Health and Care Excellence: NICE ( <a href="http://guidance.nice.org.uk/CG/Published">guidance.nice.org.uk/CG/Published</a> )                                                            | 20           |
| Guidelines International Network: GIN ( <a href="http://g-i-n.net">g-i-n.net</a> )                                                                                                                              | 22           |
| Agency for Healthcare Research and Quality: NGC ( <a href="http://guidelines.gov/">guidelines.gov/</a> )                                                                                                        | 277          |
| Scottish Intercollegiate Guidelines Network: SIGN ( <a href="http://sign.ac.uk/">sign.ac.uk/</a> )                                                                                                              | 18           |
| Dutch Guidelines ( <a href="http://oncoline.nl/index.php?language=en">oncoline.nl/index.php?language=en</a> )                                                                                                   | 2            |
| Cross references                                                                                                                                                                                                | 2            |

**Table S4.** Overview of the search strategy in Medline and Embase via Ovid.

| Search Query in Medline (Ovid MEDLINE (R) and Epub Ahead of Print, In-Process & Other Non-Indexed Citations, Daily and Versions (R) 1946 to December 20, 2019; n = 833 hits) |
|------------------------------------------------------------------------------------------------------------------------------------------------------------------------------|
| 1. practice guideline.mp. or exp Practice Guideline/                                                                                                                         |
| 2. health planning guideline.mp. or exp Health Planning Guidelines/                                                                                                          |
| 3. guideline*.m_titl.                                                                                                                                                        |
| 4. clinical protocol.mp or exp. Clinical Protocols/                                                                                                                          |
| 5. guidance.m_titl.                                                                                                                                                          |
| 6. guidance.mp.                                                                                                                                                              |
| 7. care pathway.mp.                                                                                                                                                          |
| 8. exp Evidence-Based Medicine/                                                                                                                                              |
| 8. consensus development.mp. or exp Consensus/                                                                                                                               |
| 10. exp Guideline/ or guideline.mp                                                                                                                                           |
| 11. 1 or 2 or 3 or 4 or 5 or 6 or 7 or 8 or 9 or 10                                                                                                                          |
| 12. exp Melanoma/ or melanoma.mp                                                                                                                                             |
| 13. 11 and 12                                                                                                                                                                |
| 13. limit 12 to (english or german)                                                                                                                                          |
| 14. limit 13 to yr = "2016-Current"                                                                                                                                          |
| Search Query in Embase (Embase 1974 to 2019 December 20 n = 1,222 hits)                                                                                                      |
| 1. practice guideline.mp. or exp practice guideline/                                                                                                                         |

- 
2. health planning guidelines.mp. or exp health care planning/
  3. guideline.mp.
  4. care pathway.mp.
  5. consensus development.mp. or exp consensus development/
  6. exp consensus/ or consensus.mp
  7. 1 or 2 or 3 or 4 or 5 or 6
  8. exp melanoma/ or exp cutaneous melanoma/
  9. 7 and 8
  10. limit 9 to (english or german)
  11. limit 10 to yr = "2016-Current"
- 

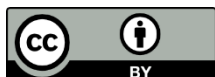

© 2020 by the authors. Licensee MDPI, Basel, Switzerland. This article is an open access article distributed under the terms and conditions of the Creative Commons Attribution (CC BY) license (<http://creativecommons.org/licenses/by/4.0/>).
